# Supplementary material for: Variational autoencoders learn transferrable representations of metabolomics data
Source: Springer Nature journal article supplement (doi:10.1038/s42003-022-03579-3), 2022-06-30
Supplement: MOESM2 [file 42003_2022_3579_MOESM2_ESM.pdf › 42003_2022_3579_MOESM2_ESM.pdf]

## Description of Additional Supplementary Files

**File name:** Supplementary Data 1

**Description:** The source data behind the graphs 4d-f in this paper.

**File name:** Supplementary Data 2

**Description:** Nominal and FDR-adjusted pvalues of univariate associations between VAE latent dimensions and single metabolites for each of the disease datasets (Diabetes, Schizophrenia, and AML).
